1 **Despite reproductive interference, the net outcome of reproductive interactions**

2 **among spider mite species is not necessarily costly**

3 Salomé H. Clemente, Inês Santos, Rita Ponce, Leonor R. Rodrigues, Susana A. M.

4 Varela\* and Sara Magalhães\*<sup>1</sup>

5

6 \*co-last authorship

7 cE3c – Centre for Ecology, Evolution and Environmental Changes

8 Faculdade de Ciências da Universidade de Lisboa

9 Edifício C2, 3º Piso

10 Campo Grande

11 1749-016 Lisbon

12 Portugal

13 <sup>1</sup>: [snmagalhaes@fc.ul.pt](mailto:snmagalhaes@fc.ul.pt)

14

15

16

17 **Abstract**

18 Reproductive interference is considered a strong ecological force, potentially leading  
19 to species exclusion. This supposes that the net effect of reproductive interactions is  
20 strongly negative for one of the species involved. Testing this requires a  
21 comprehensive analysis of interspecific reproductive interactions, accounting for the  
22 order and timing of mating events, and for their effects on either fertility or fecundity.  
23 To this aim, we measured reproductive interactions between a focal species,  
24 *Tetranychus urticae*, and an invasive (*T. evansi*) and a resident (*T. ludeni*) species,  
25 varying the mating sequence and interval, and measuring the effect of such crosses on  
26 fecundity and offspring sex ratio (a measure of fertility, as these species are  
27 haplodiploid). We found that mating with heterospecifics affected fecundity and sex  
28 ratio negatively, but also positively, depending on the species involved, and on the  
29 order and timing of mating events. To assess the net effect of these interactions on *T.*  
30 *urticae*, we performed a meta-analysis on the data obtained. This revealed that the net  
31 effect of the interaction *T. urticae* – *T. evansi* was neutral, whereas that between *T.*  
32 *urticae* and *T. ludeni* was slightly positive for *T. urticae*. Therefore, the net effect of  
33 such interactions may be weak despite strong effects of particular events. In natural  
34 situations the outcome of reproductive interactions will thus hinge upon the frequency  
35 of each event.

36

37 **Keywords:**

38 Biological invasions, sperm precedence, *Tetranychus*, reproductive interactions,  
39 mating, meta-analysis.

40

41 **Introduction**

42 Reproductive interference refers to any kind of sexual interaction between two species  
43 that diminishes the fitness of at least one of them (Gröning and Hochkirch 2008, Kishi  
44 et al. 2009, Burdfield-Steel and Shuker 2011). It can occur at different levels:  
45 overlapping or masking conspecific sexual signals (signal jamming), interrupting  
46 conspecific sexual interactions, or promoting heterospecific matings, thereby reducing  
47 the frequency or outcome of conspecific matings, or inducing hybridization, leading to  
48 a lower offspring fitness (Gröning and Hochkirch 2008). Given these negative effects,  
49 reproductive interference may lead to the exclusion of one of the species involved  
50 (Gröning and Hochkirch 2008; Kishi et al. 2009). Indeed, theory predicts that  
51 reproductive interference may contribute to species exclusion more often than  
52 resource competition (Kishi et al. 2009, Kishi and Nakazawa 2013). For example, it has  
53 been posited that reproductive interference may underlie the success of some invasive  
54 species (e.g. Nishida et al. 2012), if it is stronger between invasive and residents than  
55 among residents.

56         The bulk of studies of reproductive interference concerns the fitness outcome  
57 of interspecific matings of two species that do not produce viable hybrids (Gröning and  
58 Hochkirch 2008). In this case, the reproductive effects of the interspecific interaction  
59 will be expressed only when organisms mate with both conspecifics and  
60 heterospecifics (as mating with conspecifics alone will yield no offspring). Moreover,  
61 clearly evaluating the effects of reproductive interference on species exclusion  
62 necessitates measuring all possible combinations of mating order (i.e., whether  
63 heterospecific matings occur before or after conspecific ones) and timing (i.e., the  
64 interval between mating events) between pairs of species. Moreover, it is important to

65 test whether reproductive interactions affect fecundity (egg production) or fertility  
66 (egg fertilization). This information can then be integrated to predict the net outcome  
67 of reproductive interactions between species. Despite the many studies on  
68 reproductive interference, none has yet applied this approach. Indeed, some studies  
69 attempt to predict how reproductive interference affects species exclusion, but do so  
70 while not measuring all possible effects of this interaction. For example, Takafuji  
71 (1997) used a Lotka-Volterra modified model to predict the effect of reproductive  
72 interference between two *Panonychus* mite species from Japan (*Panonychus citri* and  
73 *P. mori*) on species exclusion. However, only one possible combination of mating  
74 interactions between these two species (a female mating first with a heterospecific  
75 then with a conspecific) was tested. In contrast, other studies consider different orders  
76 of mating events (eg, Kyogoku and Nishida 2013), but do not integrate this information  
77 to generate a prediction concerning the net effect of reproductive interactions on  
78 species distributions.

79         Here, we aimed at testing how the outcome of different mating events among  
80 spider mite species can be integrated into a net measure of the effect of reproductive  
81 interactions on a focal species. Spider mites are haplodiploid, hence the distinction  
82 between fecundity and fertilization effects can be made given that fertilized eggs result  
83 in female offspring and unfertilized eggs in male offspring. Thus, fertilization failures  
84 can be detected by a reduction in the proportion of female offspring, whereas  
85 impairment of egg production is detected by a reduction in the total number of  
86 offspring. Moreover, reproductive interference has been frequently observed in this  
87 group (Collins and Margolies 1994; Takafuji et al. 1997; Ben-David et al. 2009, Sato et  
88 al. 2014).

89           We studied the outcome of reproductive interactions in a system composed of  
90 one focal species – the spider mite *Tetranychus urticae* – in sexual heterospecific  
91 interactions with another resident species, *T. ludeni*, and an invasive species, *T. evansi*.  
92 These three herbivorous species co-occur in the Mediterranean region and are often  
93 found on the same host plants (Escudero and Ferragut 2005, Boubou et al. 2012,  
94 Godinho et al. 2016). Whereas *T. urticae* and *T. ludeni* are resident species, *T. evansi*  
95 has only recently invaded the European continent (Boubou et al. 2012). We used *T.*  
96 *urticae* as the focal species because it is the spider-mite species for which most  
97 information is available. Indeed, it has been shown that this species exhibits first male  
98 sperm precedence, with second matings being sometimes effective if they occur within  
99 the 24 hours following the first (Helle 1967). However, females that mate multiple  
100 times with conspecific males, after the 24h interval, produce fewer fertilized offspring  
101 (i.e., females) (Macke et al. 2012), suggesting that sperm displacement after 24h is  
102 possible. Hence, we hypothesize that mating order and the mating interval will affect  
103 the outcome of reproductive interference in *T. urticae*. Whereas information on the  
104 interaction between *T. urticae* and *T. ludeni* is as yet lacking, heterospecific matings  
105 have been observed between *T. urticae* and *T. evansi* (Sato et al. 2014, 2016, Clemente  
106 et al. 2016). Moreover, *T. evansi* has been shown to exclude *T. urticae* on tomato  
107 plants (Sarmiento et al. 2011a), a result that correlates with field observations  
108 (Ferragut et al. 2013). Finally, a recent study has shown that, in competition with *T.*  
109 *evansi*, the population growth of *T. urticae* is more severely affected when plants are  
110 colonized by virgin females than when plants are colonized by mated females,  
111 suggesting that reproductive interference may be responsible for the species  
112 distribution patterns observed (Sato et al. 2014).

113

## 114 **Material and Methods**

### 115 **Stock Cultures**

116 The mite species used in this study were collected in Carregado (39.022260, -  
117 8.966566), Portugal, and all laboratory populations were established from an initial  
118 pool of 300 mated females. The laboratory population of *T. urticae* was collected on  
119 tomato plants (*Solanum lycopersicum*) in May 2010, that of *T. evansi* on *Physalis*  
120 *angulata* in May 2012 and that of *T. ludeni* on tomato in September 2012. The  
121 populations of *T. evansi* and *T. ludeni* became extinct in August 2012 and May 2013,  
122 respectively, being subsequently replaced with populations from the same location,  
123 both collected in *Datura stramonium* plants. Both populations of *T. evansi* and *T.*  
124 *ludeni* were used in the experiments.

125       Species identity was confirmed through polymerase chain reaction–restriction  
126 fragment length polymorphism (PCR–RFLP) of the ITS2 region (Hurtado et al. 2008), on  
127 approximately 50 females of each population. Total genomic DNA was extracted from  
128 each individual spider mite using the Sigma-Aldrich GenElute™ Mammalian Genomic  
129 DNA Miniprep Kit, following manufacturer’s instructions, except for the elution  
130 volume, which we set to 20µL of RNase free water (Qiagen NV, Venlo, The  
131 Netherlands) to increase the concentration of DNA obtained from this very small  
132 animal (c.a. 300µm long).

133       Adult females from populations used in this experiment were screened for  
134 *Wolbachia* using the primers *wsp* (*Wolbachia*-specific primers) 81F and 691R (Braig et  
135 al. 1998). We did this to avoid potential cytoplasmic incompatibility as a confounding  
136 factor in our measurements. PCR assay procedures were as described in Breeuwer

137 (1997). Results were positive for *Wolbachia* infection and spider mite populations were  
138 thus treated by placing adult females in detached bean leaves with tetracycline  
139 (0.025% w/v) for three consecutive generations, then absence of *Wolbachia* was  
140 confirmed using the same protocol as above. Other endosymbionts tested  
141 (Arsenophorous, Rickettsia, Spiroplasma and Cardinium) were absent from these  
142 populations.

143 Bean (*Phaseolus vulgaris*) and tomato (*Solanum lycopersicum*) plants were planted  
144 every week and grown in an herbivore-free greenhouse, being watered two to three  
145 times a week. *T. urticae* populations were maintained on trays with 6-10 bean plants  
146 whereas those of *T. evansi* and *T. ludeni* were kept on tomato plants at 25°C, both with  
147 a 16 L: 8D photoperiod. Plant trays were changed every two weeks, placing old leaves  
148 on top of uninfested plants. Cultures were kept inside plastic boxes (28x39x28 cm),  
149 with an opening of 25x15 cm polyamide fabric (80 µm mesh width).

150

151

## 152 **Experimental procedure**

153 Experiments were done on the plant species from which the female tested had been  
154 cultured. As in the literature there was no information on whether hybridization is  
155 possible between *T. urticae* and *T. ludeni*, we studied the outcome of a single  
156 heterospecific mating between these two species (the same analysis for *T. urticae* and  
157 *T. evansi* was performed in a previous experiment (Clemente et al. 2016)).  
158 Subsequently, we set out to study the heterospecific interactions between *T. urticae*  
159 and the invasive *T. evansi* and the resident *T. ludeni* species for which we analysed the  
160 outcome of mating with a heterospecific male before or after a conspecific male. Since

161 we focused on interactions with *T. urticae* (the focal species of our study), we  
162 performed crosses between *T. urticae* males or females and *T. evansi* or *T. ludeni*  
163 males or females, but not between the two latter species. All experiments were  
164 performed in an acclimatized room at approximately 25°C.

165

166 **a) The outcome of a single heterospecific mating between *T. urticae* and *T. ludeni***

167 To determine whether hybridization occurred between *T. urticae* and *T. ludeni*, we  
168 measured the offspring sex-ratio resulting from single heterospecific matings. Given  
169 that only females develop from fertilized eggs, a whole-male offspring would mean  
170 unsuccessful hybridization. However, even in the absence of viable hybrids,  
171 heterospecific matings could result in aborted development of heterospecifically-  
172 fertilized eggs, meaning that females would produce fewer eggs. To test this, we  
173 compared the fecundity of *T. urticae* and *T. ludeni* females that mated with a  
174 heterospecific male to that of virgin females and of females mated with a conspecific  
175 male.

176 Females were collected from the stock populations, isolated at the quiescent  
177 deutonymph stage (which precedes their last moult before reaching adulthood), and  
178 kept in groups of approximately 15 females on bean (*Phaseolus vulgaris*) leaf discs  
179 (2 cm<sup>2</sup>) until emergence, to ensure their virginity. Adult males were collected from the  
180 same stock populations and kept isolated in leaf discs (2 cm<sup>2</sup>) for at least 24 hours  
181 before the assay, to ensure sperm replenishment. Females were placed individually in  
182 leaf discs (1 cm<sup>2</sup>) with either a conspecific or a heterospecific male and observed  
183 continuously until copulation occurred. Only matings that lasted at least 1 minute were  
184 considered effective (Boudreaux 1963). These experiments had the maximum duration



185 of 2 hours. If no mating occurred within this time, individuals were discarded.  
186 Subsequently, females were isolated in a leaf disc (2 cm<sup>2</sup>), then transferred to a new  
187 disc every three days until the female's death. The number of eggs laid was registered  
188 after female transfer to a new leaf disc. Eggs were left to develop until adulthood  
189 when offspring sex-ratio could be determined. With this data, we tested whether  
190 heterospecific matings affected (a) the mean daily fecundity and (b) offspring sex ratio  
191 (hence the proportion of fertilized offspring).

192

### 193 **b) The outcome of heterospecific matings that precede or follow conspecific ones**

194 To determine the outcome of mating with a heterospecific male before or after a  
195 conspecific male between *T. urticae* and the other two species, we compared the  
196 fecundity and offspring sex ratio of those crosses to that of females that mated with  
197 two conspecific males. The experimental procedure was as described above, except  
198 that we let females mate with a conspecific or a heterospecific male, then placed the  
199 focal females with another male. We created the following mating sequences:  
200 conspecific-conspecific, conspecific-heterospecific and heterospecific-conspecific. The  
201 second mating occurred either immediately after the first mating (0 hours treatment)  
202 or 24 hours later. If no mating was observed within 2 hours, the females were  
203 discarded. We used the 0h and 24h mating intervals because the time interval was  
204 shown to affect the degree of sperm precedence in spider mites (Helle 1967).

205

### 206 **Statistical analysis**

207 All analyses were carried out using R (version 3.3.2, R Development Core Team 2016).

208 To analyse female fecundity within each species (*T. urticae*, *T. evansi* and *T. ludeni*), we

209 used linear models (LM procedure), considering the mean number of eggs per day as  
210 the response variable (oviposition rate). To analyse offspring sex ratio within each  
211 species, we used generalized linear models (GLM procedure) with a quasi-binomial  
212 distribution – due to overdispersion of the data –, considering the number of female  
213 and male offspring produced by each focal female as the response variables (analysed  
214 together with the function `cbind`).

215 For both types of analyses, we used as fixed factors the mating order (with  
216 three levels: the control treatment, where a female mated twice with conspecific  
217 males; an experimental treatment where the heterospecific male was the first to mate  
218 with the female; and another experimental treatment where the heterospecific male  
219 was the second to mate with the female) and the mating interval (with two levels:  
220 either 0h or 24h interval between matings). We also tested the interaction among  
221 these fixed factors. If the interaction was non-significant, a backward stepwise  
222 procedure was used to find the best simplified fitted model. We performed  
223 independent analyses for each species within each species pair (i.e. for *T. urticae* and  
224 *T. evansi* females in *T. urticae* versus *T. evansi* crosses; and for *T. urticae* and *T. ludeni*  
225 females in *T. urticae* versus *T. ludeni* crosses), as shown in Table 1.

226 We did a first block of experiments with the populations of *T. evansi* and *T.*  
227 *ludeni* collected in 2012 (block 1). For question b) we also did a second block of  
228 experiments with populations of those species from 2013 (block 2). In block 2 we did  
229 not repeat all treatments, but only the crosses that were not complete before the  
230 extinction of block 1 populations, as well as their respective controls – hence, there  
231 were no treatments that were only performed in block 2. Because of that, instead of  
232 including the factor block in the statistical models as a covariate, we did all the

233 statistical analyses with block 1 only and with block 1 and block 2 together. Since the  
234 results were qualitatively similar, here we present the results from the analysis with  
235 block 1 and block 2 together.

236 With the outputs from these analyses, we further compared the general net  
237 effects of reproductive interference from the invasive and resident species on *T.*  
238 *urticae* with a meta-analysis procedure (Borenstein et al. 2009; Nakagawa and Poulin  
239 2012). This procedure allowed us to test which species, within each species pair, exerts  
240 the strongest effect on the other; and whether, between species pairs, invasive-  
241 resident heterospecific sexual interactions are more severe than resident-resident  
242 interactions. For that we calculated the effect sizes of the statistical results obtained  
243 from the LM and GLM analyses described above and shown in Table 1, converting p-  
244 values and sampling sizes into the Fishers' z transformation of the correlation  
245 coefficient ( $Z_r$ ) and its corresponding variance ( $\text{Var}_{Z_r}$ ). The correlation coefficient varies  
246 between -1 and 1 and can be interpreted as the strength of female response with  
247 respect to oviposition rate and offspring sex ratio: the more significant the p-values  
248 obtained from the LM and GLM models the greater the departure from a random  
249 response, and so the "stronger" the effect of reproductive interference of *T. evansi*  
250 and *T. ludeni* on *T. urticae* and vice versa.

251 We used the p-values from the contrasts between the control and the two  
252 experimental treatments. However, to avoid duplicating the contribution of the  
253 control to the effect sizes (Borenstein et al. 2009), we did two independent analysis,  
254 one for when a female's first mating was with a heterospecific male and a second  
255 analysis for when a female's second mating was with a heterospecific male. The effect  
256 sizes are shown in Table S1 from the Supplementary Material. Additionally, because

257 each female contributed with two data outputs (oviposition rate and offspring sex  
258 ratio), and to avoid redundancy in our data again, we calculated a synthetic effect size  
259 that was defined as the mean between oviposition rate and offspring sex ratio and  
260 their variance (Borenstein et al. 2009). To calculate the variance of the mean, we had  
261 to calculate a correlation between outcomes (Borenstein et al. 2009). We did this using  
262 a Pearson correlation, and obtained 0.18 (shown in Table S2 from the Supplementary  
263 Material).

264 The effect sizes could be either positive or negative, depending on whether the  
265 interactions of *T. urticae* with the other species were beneficial or costly to *T. urticae*:  
266 positive effects occurred when oviposition rate and offspring sex ratio increased in *T.*  
267 *urticae* females or decreased in *T. evansi* and *T. ludeni* females; negative effects  
268 occurred in the opposite way.

269 We used the Compute.es package (Del Re 2013) to convert p-values and sample  
270 sizes into  $Z_r$  and  $\text{Var}_{Z_r}$  (see Tables S1 and S2 in Supplementary Material) and the  
271 Metafor package v1.9-8 (Viechtbauer 2010) for the meta-analysis (Table S3 in  
272 Supplementary Material). We used a meta-analytic fixed-effects linear model (using  
273 the rma.uni function in Metafor) with the interfering species (Invasive versus Resident)  
274 as the explanatory variable.

275

## 276 **Results**

### 277 **a) The outcome of a single heterospecific mating between *T. urticae* and *T.*** 278 ***ludeni***

279 Crosses between *T. ludeni* and *T. urticae* resulted in 100% male offspring, indicating  
280 that hybrid production between these species is inexistent. The fecundity of *T. urticae*

281 females that mated heterospecifically was not significantly different from that of virgin  
282 females or from that of females mated with a conspecific male (Figure 1 and Table 1).  
283 On the other hand, the fecundity of *T. ludeni* females that mated with conspecifics or  
284 heterospecifics was significantly higher than that of virgin females (Figure 1 and Table  
285 1). Therefore, mating with heterospecific males does not result in the aborted  
286 fertilization of oocytes for *T. urticae* and *T. ludeni* females.

287

288 **b) The outcome of heterospecific matings that precede or follow conspecific**  
289 **ones**

290 (i) *T. urticae* vs *T. evansi*

291 The oviposition rate of *T. urticae* females that mated with either a conspecific and a  
292 heterospecific or with two conspecific mates varied significantly according to mating  
293 order in interaction with mating interval (Table 1). Specifically, it was higher for *T.*  
294 *urticae* females that mated with *T. evansi* males just before mating than for any other  
295 cross at 0h mating interval (Fig. 2a, Table 1). At the 24h interval, however, mating  
296 combinations did not affect this trait. The proportion of fertilized offspring (*i.e.*,  
297 daughters) of females *T. urticae* also varied significantly according to mating order in  
298 interaction with mating interval (Table 1). But in contrast to the oviposition rate, this  
299 trait was affected at the 24h interval only, in which mating with a *T. evansi* male after  
300 mating with a conspecific male resulted in a decrease in the proportion of fertilized  
301 offspring of *T. urticae* females, relative to other mating sequences (Fig. 2b, Table 1).

302 The mating order also affected differentially the oviposition rate of *T. evansi*  
303 females, depending on the interval between matings. *T. evansi* females that mated  
304 with *T. urticae* males immediately after conspecific mates had reduced oviposition rate

305 relative to other mating sequences at this time interval (Fig. 2c; Table 1); however, if  
306 the heterospecific cross occurred 24 hours before the conspecific cross, the oviposition  
307 rate of *T. evansi* females increased relative to other mating sequences at this time  
308 interval (Fig. 2c; Table 1). These crosses did not significantly affect sex ratio (Fig. 2d;  
309 Table 1).

310

311 (ii) *T. urticae* vs *T. ludeni*

312 In crosses with the resident species (*T. ludeni*), the oviposition rate of *T. urticae*  
313 females varied significantly according to mating order in interaction with mating  
314 interval (Table 1). Specifically, we found no effect of the mating order at 0h interval,  
315 but at 24h interval the oviposition rate of females that mated first with a conspecific  
316 then with a heterospecific male was lower than that of other crosses at this time  
317 interval. (Fig. 3a; Table 1). *T. urticae* females suffered no significant changes in  
318 offspring sex ratio from matings with *T. ludeni* males (Figure 3b; Table 1).

319 In *T. ludeni* females, the oviposition rate and the proportion of fertilized  
320 offspring varied significantly according to mating order in interaction with the mating  
321 interval (Table 1). Compared to the control treatment, *T. ludeni* females had lower  
322 oviposition rate when mating with *T. urticae* males immediately before conspecifics  
323 males, or when hetero- and conspecific matings had 24h interval, irrespective of the  
324 mating order (Fig. 3c, table 1). Additionally, when *T. ludeni* females mated with *T.*  
325 *urticae* males 24h after conspecific matings, the proportion of fertilized offspring was  
326 significantly lower than that of other crosses at this time interval (Figure 3d; Table 1).  
327 The mating sequence had no effect on the sex ratio at the 0h interval.

328

329 **c) Meta-analysis on the effects of mating with heterospecifics**

330 Because the effects of mating with heterospecifics were contingent upon the species  
331 involved, but also the order and timing of mating events, we performed a meta-  
332 analysis on these results to obtain the net effect of each interaction (Figure 4 and  
333 Tables S1, S2 and S3).

334 The overall effect of mating with heterospecifics was neutral, though slightly  
335 positive, for *T. urticae*, both when the female's first and second matings were with a  
336 heterospecific male (first male heterospecific:  $Z_r = 1.088$ ,  $P = 0.277$ ; second male  
337 heterospecific:  $Z_r = 1.439$ ,  $P = 0.150$ ). Matings involving the invasive species did not  
338 result in overall net costs or benefits for *T. urticae* (first male heterospecific:  $Z_r = -$   
339  $0.460$ ,  $P = 0.646$ ; second male heterospecific:  $Z_r = 0.087$ ,  $P = 0.931$ ). Matings with the  
340 resident species, on the other hand, were mainly beneficial, both for first ( $Z_r = 1.878$ ,  
341  $P = 0.060$ , marginally significant) and second matings with a heterospecific male  
342 ( $Z_r = 1.989$ ,  $P = 0.047$ ). The difference between matings with the invasive and the  
343 resident species was, however, non-significant (first male heterospecific:  $Z_r = 1.598$ ,  
344  $P = 0.110$ ; second male heterospecific:  $Z_r = 1.376$ ,  $P = 0.169$ ).

345 Concerning the effect of the mating interval, when matings occurred at the 0h  
346 interval, the net effect for *T. urticae* from both invasive (first male heterospecific:  
347  $Z_r = 0.080$ ,  $P = 0.936$ ; second male heterospecific:  $Z_r = 1.234$ ,  $P = 0.217$ ) and resident  
348 (first male heterospecific:  $Z_r = 0.497$ ,  $P = 0.619$ ; second male heterospecific:  $Z_r = -0.671$ ,  
349  $P = 0.502$ ) species was mainly neutral, with no significant differences between the net  
350 effect from the invasive and the resident species (first male heterospecific:  $Z_r = -0.279$ ,  
351  $P = 0.781$ ; second male heterospecific:  $Z_r = 1.310$ ,  $P = 0.190$ ). When matings occurred  
352 at the 24h interval, the net effect for *T. urticae* from matings with the invasive species

353 was again neutral (first male heterospecific:  $Z_r = -0.787$ ,  $P = 0.431$ ; second male  
354 heterospecific:  $Z_r = -1.237$ ,  $P = 0.216$ ). Contrastingly, however, the net effect for *T.*  
355 *urticae* from matings with the resident species was significantly positive for both first  
356 ( $Z_r = 2.219$ ,  $P = 0.027$ ) and second matings ( $Z_r = 3.223$ ,  $P = 0.001$ ) with heterospecifics.  
357 Additionally, there were significant differences between the invasive and resident  
358 species (first male heterospecific:  $Z_r = -2.051$ ,  $P = 0.040$ ; second male heterospecific:  
359  $Z_r = -3.099$ ,  $P = 0.002$ ).

360

## 361 **Discussion**

362 In this study, we investigated the consequences of mating with heterospecifics for the  
363 fertilization success and offspring viability in a system composed of three spider-mite  
364 species. We found that heterospecific matings between *T. urticae* and *T. ludeni* did not  
365 result in fertilized offspring (i.e., females), nor did it have any negative effects on egg  
366 viability, as shown for matings between *T. urticae* and *T. evansi* (Sato et al. 2014,  
367 Clemente et al. 2016). In fact, a *T. ludeni* female that mates with a *T. urticae* male will  
368 produce more male offspring than a virgin *T. ludeni* female. Second, the effects of  
369 heterospecific matings on the outcome of previous or subsequent matings with  
370 conspecifics were highly dependent on the species pair involved, on the trait measured  
371 and on the timing and order of mating events. Despite strong effects of particular  
372 mating sequences, our meta-analysis for the net effect of reproductive interactions on  
373 *T. urticae* revealed a neutral net effect of the interaction with *T. evansi*, and a positive  
374 net effect of the interaction with *T. ludeni*.

375 Positive effects of interspecific reproductive interactions were found for  
376 fecundity. This can be due to a stimulation of oogenesis by the sperm of heterospecific



377 males, increasing the availability of oocytes to subsequent matings with conspecifics.  
378 Indeed, oogenesis is stimulated by conspecific sperm in several species (Qazi et al.  
379 2003, Xu and Wang 2011). This could also be the case with heterospecific sperm. If so,  
380 it could explain the higher fecundity found in crosses between *T. urticae* and *T. evansi*.  
381 In fact, earlier studies have documented that interactions with heterospecific males  
382 are not always negative. In some gynogenetic species, heterospecific mating is a  
383 prerequisite for embryogenesis (Gumm and Gabor 2005, Schlupp 2010). Moreover, in  
384 some invertebrate species, females receive nuptial gifts from heterospecific males  
385 (Vahed 1998, Costa-Schmidt and Machado 2012). However, to our knowledge, this is  
386 the first time that an increase in fecundity following a heterospecific mating is  
387 described in the literature. Such effects may thus be rare. Still, earlier studies may have  
388 overlooked them because they have not examined the roles of the order of mating in  
389 the outcome of heterospecific mating interactions.

390         Nonetheless, we also detected several negative effects of mating with  
391 heterospecifics, as found in most studies of reproductive interference (Gröning and  
392 Hochkirch 2008, Kishi 2015). We found both a reduction in the number of eggs laid and  
393 a decrease in fertilization success (i.e., offspring sex ratio). However, the incidence of  
394 these two effects varied according to the species involved, the order of matings and  
395 the time interval. Whereas effects on fecundity were found in several mating  
396 sequences, an effect on fertilization success was found only when the heterospecific  
397 male mated with the female 24 hours after the conspecific male. This is at odds with  
398 expectations stemming from findings on conspecific matings, which show (a) first-male  
399 precedence and (b) exceptions to this rule only if the second male mates immediately

400 after the first. Therefore, the mechanisms underlying sperm displacement by  
401 heterospecific males in spider mites should be investigated.

402 The meta-analysis confirmed this finding, showing that effects were stronger at  
403 the 24h interval. Also, it showed that effects were similar irrespective of the order of  
404 the mating events. In fact, in some cases, effects of mating with heterospecifics are  
405 stronger if such matings follow conspecific ones. This suggests that first male  
406 precedence found in conspecific matings cannot be extrapolated to matings involving  
407 heterospecific sperm. This contrasts with the recent finding that effects of  
408 heterospecific matings in *Drosophila* could be predicted from the harmful effects of  
409 conspecific mates (Yassin and David 2015), and that genes involved in conspecific male  
410 precedence also affect sperm precedence in multiple matings involving heterospecifics  
411 (Civetta and Finn 2014). This indicates that the equivalence of effects of conspecific  
412 and heterospecific sperm on the outcome of conspecific matings is dependent on the  
413 type of effect and/or the species involved in the interaction.

414 Despite the fact that many interactions have a negative outcome, the meta-  
415 analysis also revealed that the overall effect of mating with heterospecifics is neutral  
416 for *T. urticae*. This is because the negative impact of mating with heterospecifics is  
417 compensated by the negative impact that *T. urticae* males have on fertility and  
418 fecundity of the other species. This leads to the prediction that selection for species  
419 discrimination should be low in *T. urticae*, as the net outcome of interspecific  
420 reproductive interactions is not costly. Indeed, it has been shown that both males and  
421 females of *T. urticae* show weak, if not absent, discrimination between conspecifics  
422 and *T. evansi* mates (Sato et al. 2014, 2016, Clemente et al. 2016). However, it may be  
423 possible that costs are found if matings with heterospecifics become very frequent.

424           Since effects of heterospecific matings depend on the order and timing of  
425 occurrence, the outcome of these interactions will depend on the frequency with  
426 which those different types of matings occur in nature. In the species studied here,  
427 conspecific males tend to guard quiescent females (i.e, last larval stage before  
428 becoming adult female), to ensure mating immediately after emergence. If males  
429 guard preferentially conspecific females, as has been shown in other spider mite  
430 species pairs (Collins et al. 1993, Takafuji et al. 1997), heterospecific matings will occur  
431 more often after rather than before conspecific ones. If this is the case, the effects of  
432 *T. evansi* and of *T. ludeni* on the offspring of *T. urticae* females will not be the same.  
433 Indeed, whereas mating with *T. evansi* males after a conspecific male leads to a  
434 reduction in offspring fertilization in *T. urticae*, *T. ludeni* matings that follow conspecific  
435 ones have no effect on the offspring of *T. urticae* females. Moreover, we have shown  
436 that females become less receptive to both conspecific and heterospecific matings if  
437 the first mating has occurred 24h before the second (Clemente et al. 2016). This leads  
438 to the prediction that the most common mating sequence among these species will be  
439 a heterospecific mating immediately following a conspecific one. If this is the case,  
440 then we predict that the effect of heterospecific matings in *T. urticae* will be relatively  
441 mild.

442           The meta-analysis also showed that the net effect of mating with *T. ludeni*, the  
443 resident species, was positive, whereas that of mating with *T. evansi*, the invasive  
444 species, was neutral. Therefore, our hypothesis that reproductive interference could  
445 be more costly (or less beneficial) between resident and invasive species than between  
446 residents is confirmed by our results. However, as the net outcome of the resident-  
447 invasive interaction was neutral, reproductive interference cannot be invoked to

448 explain the exclusion of *T. urticae* in habitats with *T. evansi* (Ferragut et al. 2013,  
449 Sarmiento et al. 2011b). Other factors may contribute to this exclusion, as the  
450 production of a dense web by *T. evansi*, which prevents heterospecifics from accessing  
451 the surface of the leaves to feed and oviposit (Sarmiento et al. 2011b). Importantly,  
452 however, we show that the occurrence and strength of reproductive interference  
453 cannot be assessed with a partial evaluation of the outcome of reproductive  
454 interactions. Indeed, the order and interval between matings have great influence on  
455 the outcome of heterospecific interactions. Therefore, the net outcome will hinge on  
456 the frequency of such events. This confirms the importance of using complete  
457 experimental designs on the detection and characterization of reproductive  
458 interference.

459

#### 460 **Acknowledgements**

461 The authors wish to thank Yukie Sato and Maurice W. Sabelis for helpful discussions  
462 during the early stages of this work. These experiments and Inês Santos were funded  
463 by Portuguese National Funds through an FCT-ANR project (FCT-ANR//BIA-  
464 EVF/0013/2012) to SM and Isabelle Olivieri. SHC and LRR had PhD fellowships funded  
465 by FCT (SFRH/ BD/ 90156/2012 and SFRH/BD/87628/2012, respectively). SAMV and RP  
466 had Post-doctoral fellowships from FCT, (SFRH/BPD/66042/2009) and (SFRH / BPD /  
467 42801 /2008) respectively. We also thank Margarida Santos Reis for her support during  
468 the initial phase of this project. The authors declare no conflict of interest.

469

470 **FIGURE LEGENDS**

471

472 **Figure 1** | Average daily fecundity of virgin females, and of females that have mated  
473 with a conspecific or a heterospecific male. Tu: *T. urticae* males or females; Tl: *T. ludeni*  
474 males or females. Grey bars: matings involving *T. urticae* females; white bars: matings  
475 involving *T. ludeni* females. Error bars represent the standard errors of the mean.

476

477 **Figure 2** | Average daily fecundity and estimated offspring sex ratio resulting from  
478 interactions between *T. urticae* (a, b; grey solid bars) and *T. evansi* (c,d; striped bars)  
479 females with conspecific and heterospecific males. In each plot, bars on the left side of  
480 the dotted straight line correspond to treatments where second matings occurred  
481 immediately (0h) after the first one; bars on the right side correspond to treatments  
482 where second matings occurred 24h after the first one. "1st M": first male that mated  
483 with the female; "2nd M": second male. The interval indicates the time of occurrence  
484 of the second mating, i.e., if immediately after the first mating (0h) or 24h later. "Tu":  
485 *T. urticae* males; "Te": *T. evansi* males. Letters above the bars indicate significant  
486 differences among treatments (small letters: among crosses occurring with a 0h  
487 interval; capital letters: among crosses occurring with a 24h interval). Error bars  
488 represent the standard errors of the mean. For offspring sex ratio, we obtained the  
489 estimates of the probability of being female and correspondent standard errors of the  
490 mean from the statistical GLM models. This takes into account sex ratio variation  
491 among females, as well as the quasi-binomial correction for overdispersion of the data.

492

493 **Figure 3** | Average daily fecundity and estimated offspring sex ratio resulting from  
494 interactions between *T. urticae* (plots a, b; grey bars) and *T. ludeni* (plots c, d; white  
495 bars) females with conspecific and heterospecific males. In each plot, bars on the left  
496 side of the dotted line correspond to treatments where second matings occurred  
497 immediately (0h) after the first one; bars on the right side correspond to treatments  
498 where second matings occurred 24h after the first one. "1st M": first male that mated  
499 with the female; "2nd M": second male. The interval indicates the time of occurrence  
500 of the second mating, i.e., if immediately after the first mating (0h) or 24h later. "Tu":  
501 *T. urticae* males; "Tl": *T. ludeni* males. Letters above the bars indicate the significant  
502 differences between treatments (small letters: among crosses occurring with a 0h  
503 interval; capital letters: among crosses occurring with a 24h interval. Error bars  
504 represent the standard errors of the mean. For offspring sex ratio, we obtained the  
505 estimates of the probability of being female and correspondent standard errors of the  
506 mean from the statistical GLM models. This takes into account sex ratio variation  
507 among females, as well as the quasi-binomial correction for overdispersion of the data.  
508

509 **Figure 4** | Mean strength of reproductive interference by the invasive (*T. evansi*) and  
510 resident (*T. ludeni*) species on *T. urticae*, when a female's first (A) or second (B) mating  
511 is heterospecific. Squares show the mean effect size estimates derived from the meta-  
512 analytic models; the squares' size represent the weights given to the observed effects  
513 during the model fitting; and the bars show the 95% confidence intervals (CI) around  
514 the mean effect size estimates. Negative or positive effects towards *T. urticae* are  
515 significant when the effect size and both anchors of the CI fall below or above zero.  
516 The results of the meta-analytic models testing the effect of the interfering species

517 (invasive versus resident) on all effect sizes and for each subgroup of explanatory  
518 variables (Mating interval with a first male at 0h or 24h) are shown with the "NS",  
519 "S\*" and "S\*\*" symbols: "NS" for non-significant differences ( $p>0.05$ ); "S\*" for  
520 significant differences ( $p<0.05$ ); and "S\*\*" for significant differences ( $p<0.01$ ). At the  
521 bottom is a summary effect size representing pooled effect sizes. The effect sizes were  
522 defined as the mean between female fecundity and offspring sex ratio and their  
523 variance. To obtain the variance of the mean, we calculated a correlation between  
524 outcomes, which was 0.18.

525

526

527

528 **Table 1** | Statistical tests and contrasts for the comparisons of fecundity and offspring  
 529 sex ratio in crosses between con- and heterospecific males and females.

|                                              | Matings   |         | Fecundity (F-test)                 | Sex-ratio (F-test)                  |
|----------------------------------------------|-----------|---------|------------------------------------|-------------------------------------|
| <b>a) Single mated females</b>               |           |         |                                    |                                     |
| <b><i>T. urticae</i> vs <i>T. ludeni</i></b> |           |         |                                    |                                     |
| <b>With <i>T. urticae</i> females</b>        |           |         |                                    |                                     |
| Mating order                                 |           |         | $F_{2,78} = 1.886$ , $P = 0.1585$  |                                     |
| <u>Contrasts</u>                             | No mating | vs Tu   | $ t  = 0.922$ ; $P = 0.3595$       |                                     |
|                                              |           | vs Tl   | $ t  = 1.885$ ; $P = 0.0631$       |                                     |
|                                              | Tu        | vs Tl   | $ t  = 1.083$ ; $P = 0.2822$       |                                     |
| <b>With <i>T. ludeni</i> females</b>         |           |         |                                    |                                     |
| Mating order                                 | -         |         | $F_{2,66} = 5.636$ , $P = 0.0055$  |                                     |
| <u>Contrasts</u>                             | No mating | vs Tl   | $ t  = 2.621$ ; $P = 0.0109$       |                                     |
|                                              |           | vs Tu   | $ t  = 3.240$ ; $P = 0.0019$       |                                     |
|                                              | Tl        | vs Tu   | $ t  = 0.105$ ; $P = 0.9170$       |                                     |
| <b>b) Matings with an invasive species</b>   |           |         |                                    |                                     |
| <b><i>T. urticae</i> vs <i>T. evansi</i></b> |           |         |                                    |                                     |
| <b>With <i>T. urticae</i> females</b>        |           |         |                                    |                                     |
| Mating order                                 |           |         | $F_{2,136} = 7.919$ , $P = 0.0006$ | $F_{2,109} = 16.371$ , $P < 0.0001$ |
| Mating interval                              | -         |         | $F_{1,136} = 0.039$ , $P = 0.8440$ | $F_{1,108} = 6.878$ , $P = 0.0100$  |
| Mating order x Mating interval               |           |         | $F_{2,136} = 6.026$ , $P = 0.0031$ | $F_{2,106} = 4.963$ , $P = 0.0087$  |
| <u>Planned contrasts</u>                     |           |         |                                    |                                     |
| Mating interval 0h:                          | TuTu      | vs TuTe | $ t  = 0.712$ ; $P = 0.4719$       | $ t  = 1.430$ ; $P = 0.1556$        |
|                                              |           | vs TeTu | $ t  = 4.964$ ; $P < 0.0001$       | $ t  = 1.116$ ; $P = 0.2670$        |
|                                              | TuTe      | vs TeTu | $ t  = 3.288$ ; $P = 0.0009$       | $ t  = 0.552$ ; $P = 0.5819$        |
| Mating interval 24h:                         | TuTu      | vs TuTe | $ t  = 1.044$ ; $P = 0.2984$       | $ t  = 5.362$ ; $P < 0.0001$        |
|                                              |           | vs TeTu | $ t  = 0.406$ ; $P = 0.6852$       | $ t  = 1.419$ ; $P = 0.1587$        |
|                                              | TuTe      | vs TeTu | $ t  = 0.848$ ; $P = 0.3980$       | $ t  = 5.103$ ; $P < 0.0001$        |
| <b>With <i>T. evansi</i> females</b>         |           |         |                                    |                                     |
| Mating order                                 |           |         | $F_{2,187} = 4.680$ , $P = 0.0104$ | $F_{2,114} = 2.462$ , $P = 0.0898$  |
| Mating interval                              | -         |         | $F_{1,187} = 2.555$ , $P = 0.1116$ | $F_{1,113} = 0.045$ , $P = 0.8320$  |
| Mating order x Mating interval               |           |         | $F_{2,187} = 4.977$ , $P = 0.0078$ | $F_{2,111} = 0.368$ , $P = 0.6931$  |
| <u>Planned contrasts</u>                     |           |         |                                    |                                     |
| Mating interval 0h:                          | TeTe      | vs TeTu | $ t  = 2.841$ ; $P = 0.0050$       | $ t  = 0.295$ ; $P = 0.7680$        |
|                                              |           | vs TuTe | $ t  = 0.348$ ; $P = 0.7281$       | $ t  = 1.327$ ; $P = 0.1870$        |
|                                              | TeTu      | vs TuTe | $ t  = 2.692$ ; $P = 0.0078$       | $ t  = 1.377$ ; $P = 0.1714$        |



|                      |      |         |                        |                        |
|----------------------|------|---------|------------------------|------------------------|
| Mating interval 24h: | TeTe | vs TeTu | t  = 1.682; P = 0.0943 | t  = 1.016; P = 0.3118 |
|                      |      | vs TuTe | t  = 2.948; P = 0.0036 | t  = 0.101; P = 0.9199 |
|                      | TeTu | vs TuTe | t  = 1.561; P = 0.1203 | t  = 1.689; P = 0.0940 |

**c) Matings with a resident species**

***T. urticae* vs *T. ludeni***

**With *T. urticae* females**

|                                |   |  |                                 |                                 |
|--------------------------------|---|--|---------------------------------|---------------------------------|
| Mating order                   |   |  | $F_{2,144} = 6.997, P = 0.0013$ | $F_{2,102} = 2.516, P = 0.0858$ |
| Mating interval                | - |  | $F_{1,144} = 2.598, P = 0.1092$ | $F_{1,101} = 0.654, P = 0.4206$ |
| Mating order x Mating interval |   |  | $F_{2,144} = 3.694, P = 0.0273$ | $F_{2,99} = 1.141, P = 0.3237$  |

Planned contrasts

|                      |      |         |                        |                        |
|----------------------|------|---------|------------------------|------------------------|
| Mating interval 0h:  | TuTu | vs TuTl | t  = 0.859; P = 0.3915 | t  = 0.005; P = 0.9957 |
|                      |      | vs TlTu | t  = 0.857; P = 0.3931 | t  = 1.016; P = 0.3119 |
|                      | TuTl | vs TlTu | t  = 2.736; P = 0.0070 | t  = 1.895; P = 0.0610 |
| Mating interval 24h: | TuTu | vs TuTl | t  = 2.505; P = 0.0134 | t  = 0.164; P = 0.8700 |
|                      |      | vs TlTu | t  = 1.115; P = 0.2501 | t  = 0.964; P = 0.3370 |
|                      | TuTl | vs TlTu | t  = 1.382; P = 0.1692 | t  = 0.640; P = 0.5230 |

**With *T. ludeni* females**

|                                |   |  |                                  |                                   |
|--------------------------------|---|--|----------------------------------|-----------------------------------|
| Mating order                   |   |  | $F_{2,248} = 10.534, P < 0.0001$ | $F_{2,155} = 2.147, P = 0.1204$   |
| Mating interval                | - |  | $F_{1,248} = 5.180, P = 0.0237$  | $F_{1,154} = 2.567, P = 0.1112$   |
| Mating order x Mating interval |   |  | $F_{2,248} = 14.098, P < 0.0001$ | $F_{2,152} = 10.1064, P < 0.0001$ |

Planned contrasts

|                      |      |         |                        |                        |
|----------------------|------|---------|------------------------|------------------------|
| Mating interval 0h:  | TlTl | vs TlTu | t  = 1.297; P = 0.1957 | t  = 0.853; P = 0.3952 |
|                      |      | vs TuTl | t  = 2.605; P = 0.0097 | t  = 0.631; P = 0.5292 |
|                      | TlTu | vs TuTl | t  = 5.141; P < 0.0001 | t  = 1.619; P = 0.1075 |
| Mating interval 24h: | TlTl | vs TlTu | t  = 4.646; P < 0.0001 | t  = 4.084; P < 0.0001 |
|                      |      | vs TuTl | t  = 3.805; P = 0.0002 | t  = 0.841; P = 0.4018 |
|                      | TlTu | vs TuTl | t  = 0.401; P = 0.2020 | t  = 3.586; P = 0.0005 |

530 **Legend:** "Tu": matings involving *T. urticae* males. "Te": matings with *T. evansi* males.

531 "Tl": matings with *T. ludeni* males. "0h" and "24h" indicate the time of occurrence of

532 the second mating, i.e., if immediately after the first mating (0h) or 24h later. TuTu

533 means that both mating events were with a *T. urticae* male. TuTe means that the first

534 mating was with a *T. urticae* male and the second with a *T. evansi* male. The same logic

535 applies to TeTe, TeTu, TlTl, TlTu and TuTl.



537 **References**

- 538 Alpedrinha J. and Magalhães S. 2016. Sex Allocation: l'enfer c'est les autres? – Curr.  
539 Biol. 26: R476-R478.
- 540 Arnqvist, G. and Rowe, L. 2005. Sexual Conflict. – Princeton University Press,  
541 Princeton.
- 542 Ben-David, T. et al. 2009. Asymmetric reproductive interference between two closely  
543 related spider mites: *Tetranychus urticae* and *T. turkestanii* (Acari: Tetranychidae). –  
544 Exp. Appl. Acarol. 48: 213-227.
- 545 Braig, H. R. et al. 1998. Cloning and Characterization of a Gene Encoding the Major  
546 Surface Protein of the Bacterial Endosymbiont *Wolbachia pipientis*. – J. Bacteriol. 180:  
547 2373–2378.
- 548 Breeuwer, J. A. 1997. *Wolbachia* and cytoplasmic incompatibility in the spider mites  
549 *Tetranychus urticae* and *T. turkestanii*. – Heredity 79: 41–47.
- 550 Boubou, A. et al. 2012. Test of colonisation scenarios reveals complex invasion history  
551 of the red tomato spider mite *Tetranychus evansi*. – PLoS One 7: 35601.
- 552 Boudreaux, H. B. 1963. Biological aspects of some phytophagous mites. – Annu. Rev.  
553 Entomol. 8: 137–154.
- 554 Burdfield-Steel, E. R. and Shuker, D. M. 2011. Reproductive interference. – Curr. Biol.  
555 21: 450–451.

- 556 Civetta, A. and Finn, S. 2014. Do candidate genes mediating conspecific sperm  
557 precedence affect sperm competitive ability within species? A test case in *Drosophila*.  
558 – *G3 (Bethesda)* 4: 1701-1707.
- 559 Clemente, S. H. et al. 2016. Incomplete species recognition entails few costs in spider  
560 mites, despite first-male precedence. – *Behav. Ecol.Sociobiol.* in press. DOI  
561 10.1007/s00265-016-2124-0
- 562 Collins, R. D. et al. 1993. Guarding behavior and reproductive isolation in two  
563 tetranychid mite species (Acari: Tetranychidae). – *Ann. Entomol. Soc. Am.* 86: 111-116.
- 564 Collins, R. and Margolies, D. 1994. The effect of interspecific mating on sex ratios in the  
565 twospotted spider mite and the Banks grass mite (Acarina: Tetranychidae). –  
566 *J. Insect Behav.*, 8: 189–206.
- 567 Costa-Schmidt, L. E. and Machado, G. 2012. Reproductive interference between two  
568 sibling species of gift-giving spiders. – *Anim. Behav.* 84: 1201-1211.
- 569 Crampton, W. G. et al. 2011. Reproductive character displacement and signal ontogeny  
570 in a sympatric assemblage of electric fish. – *Evolution* 65: 1650-1666.
- 571 Crowder, D. W. et al. 2010. Plasticity in mating behaviour drives asymmetric  
572 reproductive interference in whiteflies. – *Anim. Behav.* 79: 579-587.
- 573 Del Re, A. C. 2013. compute.es: Compute Effect Sizes. R package version 0.2-2.  
574 <http://cran.r-project.org/web/packages/compute.es>.

575 delBarco-Trillo, J. and Johnston R. 2010. Adult female hamsters require long and  
576 sustained exposures to heterospecific males to avoid interspecific mating. – *Evol. Ecol.*  
577 25: 391–401.

578 Escudero, L. and Ferragut, F. 2005. Life-history of predatory mites *Neoseiulus*  
579 *californicus* and *Phytoseiulus persimilis* (Acari: Phytoseiidae) on four spider mite  
580 species as prey, with special reference to *Tetranychus evansi* (Acari: Tetranychidae). –  
581 *Biol. Control* 32: 378-384.

582 Ferragut, F. et al. 2013. The invasive spider mite *Tetranychus evansi* (Acari:  
583 Tetranychidae) alters community composition and host-plant use of native relatives. –  
584 *Exp. Appl. Acarol.* 60: 321-341.

585 Godinho, D. P. et al. 2016. Down-regulation of plant defence in a resident spider mite  
586 species and its effect upon con-and heterospecifics. – *Oecologia* 180: 161-167.

587 Gotoh, T. et al. 2015. Development and reproduction of five *Tetranychus* species  
588 (Acari: Tetranychidae): Do they all have the potential to become major pests? – *Exp.*  
589 *Appl. Acarol.* 66: 453-479.

590 Grbić, M. et al. 2011. The genome of *Tetranychus urticae* reveals herbivorous pest  
591 adaptations. – *Nature* 479: 487-492.

592 Gröning, J. and Hochkirch, A. 2008. Reproductive interference between animal species.  
593 – *Q. Rev. Biol.* 83: 257-282.

594 Gumm, J. M. and Gabor, C. R. 2005. Asexuals looking for sex: conflict between species  
595 and mate-quality recognition in sailfin mollies (*Poecilia latipinna*). – *Behav. Ecol.*  
596 *Sociobiol.* 58: 558–565.

597 Helle, W. 1967. Fertilization in the two-spotted spider mite (*Tetranychus urticae*:  
598 *Acari*). – *Entomol. Exp. Appl.* 10: 103–110.

599 Hochkirch A., Gröning J. & Bücker A. 2007. Sympatry with the devil: reproductive  
600 interference could hamper species coexistence. *Journal of Animal Ecology* 76(4): 633–  
601 642.

602 Hurtado M. A. et al. 2008. Sequence analysis of the ribosomal internal transcribed  
603 spacers region in spider mites (Prostigmata: Tetranychidae) occurring in citrus orchards  
604 in Eastern Spain: use for species discrimination. – *Ann. Appl. Biol.* 153: 167-174.

605 Kishi, S. 2015. Reproductive interference in laboratory experiments of interspecific  
606 competition. – *Popul. Ecol.* 57: 283-292.

607 Kishi, S. et al. 2009. Reproductive interference determines persistence and exclusion in  
608 species interactions. – *J. Anim. Ecol.* 78: 1043-1049.

609 Kishi, S. and Nakazawa, T. 2013. Analysis of species coexistence co-mediated by  
610 resource competition and reproductive interference. – *Popul. Ecol.* 55: 305-313.

611 Kyogoku, D. and Nishida, T. 2013. The mechanism of the fecundity reduction in  
612 *Callosobruchus maculatus* caused by *Callosobruchus chinensis* males. – *Popul. Ecol.* 55:  
613 87-93.

- 614 Kyogoku, D. 2015. Reproductive interference: ecological and evolutionary  
615 consequences of interspecific promiscuity. – *Popul. Ecol.* 57: 253-260.
- 616 Lievens, E. J. et al. 2016. Maladaptive Sex Ratio Adjustment in the invasive brine  
617 shrimp *Artemia franciscana*. – *Curr. Biol.* 26: 1463- 1467.
- 618 Macke, E. et al. 2012. Mating modifies female life history in a haplodiploid spider mite.  
619 – *Am. Nat.* 179: E147-E162.
- 620 Matsuda, T. et al. 2013. DNA-based identification of spider mites: molecular evidence  
621 for cryptic species of the genus *Tetranychus* (Acari: Tetranychidae). – *J. Econ. Entomol.*  
622 106: 463-472.
- 623 McPeck, M.A., and Gavrillets, S. 2006. The evolution of female mating preferences:  
624 differentiation from species with promiscuous males can promote speciation. –  
625 *Evolution* 60: 1967-1980.
- 626 Nakagawa, S. and Poulin, R. 2012. Meta-analytic insights into evolutionary ecology: an  
627 introduction and synthesis. – *Evol. Ecol.* 26: 1085–1099.
- 628 Navajas, M. 1998. Host plant associations in the spider mite *Tetranychus urticae* (Acari:  
629 Tetranychidae): insights from molecular phylogeography. – *Exp. Appl. Acarol.* 22: 201-  
630 214.
- 631 Navajas, M. et al. 2013. Review of the invasion of *Tetranychus evansi*: biology,  
632 colonization pathways, potential expansion and prospects for biological control. – *Exp.*  
633 *Appl. Acarol.* 59: 43-65.

- 634 Noriyuki, S. et al. 2012. Asymmetric reproductive interference between specialist and  
635 generalist predatory ladybirds. – *J. Anim. Ecol.* 81: 1077-1085.
- 636 Qazi M. C. B. et al. 2003. The developments between gametogenesis and fertilization:  
637 ovulation and female sperm storage in *Drosophila melanogaster*. – *Dev. Biol.* 256: 195–  
638 211.
- 639 Sarmiento, R. A. et al. 2011a. A herbivore that manipulates plant defence. – *Ecol. Lett.*  
640 14: 229-236.
- 641 Sarmiento, R. A. et al. 2011b. A herbivorous mite down-regulates plant defence and  
642 produces web to exclude competitors. – *PLoS One* 6: 23757.
- 643 Sato, Y. et al. 2014. Testing for reproductive interference in the population dynamics of  
644 two congeneric species of herbivorous mites. – *Heredity* 113: 495–502.
- 645 Sato, Y. et al. 2016. Why do males choose heterospecific females in the red spider  
646 mite? – *Exp. Appl. Acarol.* 68: 21-31.
- 647 Satoh, Y. et al. 2001. Mating strategy of spider mite, *Tetranychus urticae* (Acari:  
648 Tetranychidae) males: Postcopulatory guarding to assure paternity. – *Appl. Entomol.*  
649 *Zool.* 36: 41–45.
- 650 Schlupp, I. 2010. Mate Choice and the Amazon Molly: How Sexuality and Unisexuality  
651 Can Coexist. – *J. Hered.* 101: S55–S61.
- 652 Servedio, M. R. and Kirkpatrick, M. 1997. The effects of gene flow on reinforcement. –  
653 *Evolution* 51: 1764-1772.



- 654 Takafuji, A. 1986. Effectiveness of second mating for two incompatible types of the  
655 citrus red mite, *Panonychus citri* (McGregor). – Res. Popul. Ecol. 28: 91-101.
- 656 Takafuji, A. et al. 1997. Reproductive interference and its consequences for the  
657 competitive interactions between two closely related *Panonychus* spider mites. – Exp.  
658 Appl. Acarol. 21: 379-391.
- 659 Takakura, K. I. et al. 2015. Conflicting intersexual mate choices maintain interspecific  
660 sexual interactions. – Popul. Ecol. 57: 261-271.
- 661 Vahed, K. 1998. The function of nuptial feeding in insects: review of empirical studies.  
662 – Biol. Rev. Camb. Philos. 73: 43–78.
- 663 Vala, F. et al. 2000. *Wolbachia*-induced hybrid breakdown in the two-spotted spider  
664 mite *Tetranychus urticae* Koch. – P. Roy. Soc. Lond. B Bio. 267: 1931-1937.
- 665 Viechtbauer, W. 2010. Conducting meta-analyses in R with the metafor package. – J.  
666 Stat. Softw. 36: 1-48.
- 667 Wang, P. et al. 2010. Crossing experiments and behavioral observations reveal  
668 reproductive incompatibility among three putative species of the whitefly *Bemisia*  
669 *tabaci*. – Insect Sci. 17: 508-516.
- 670 Yassin, A. and David, J. R. 2016. Within-species reproductive costs affect the  
671 asymmetry of satyriation in *Drosophila*. – J. Evol. Biol. 29: 455-60.
- 672 Xu, J. and Wang, Q. 2011. Seminal fluid reduces female longevity and stimulates egg  
673 production and sperm trigger oviposition in a moth. – J. Insect Physiol. 57: 385-390.

674

675 **Supporting Information**

676 The following Supporting Information has been made available in the online version of  
677 this article.

678 Table S1 | All effect sizes extracted for the meta-analyses.

679 Table S2 | Effect sizes used in the meta-analyses.

680 Table S3 | Meta-analysis output.

681

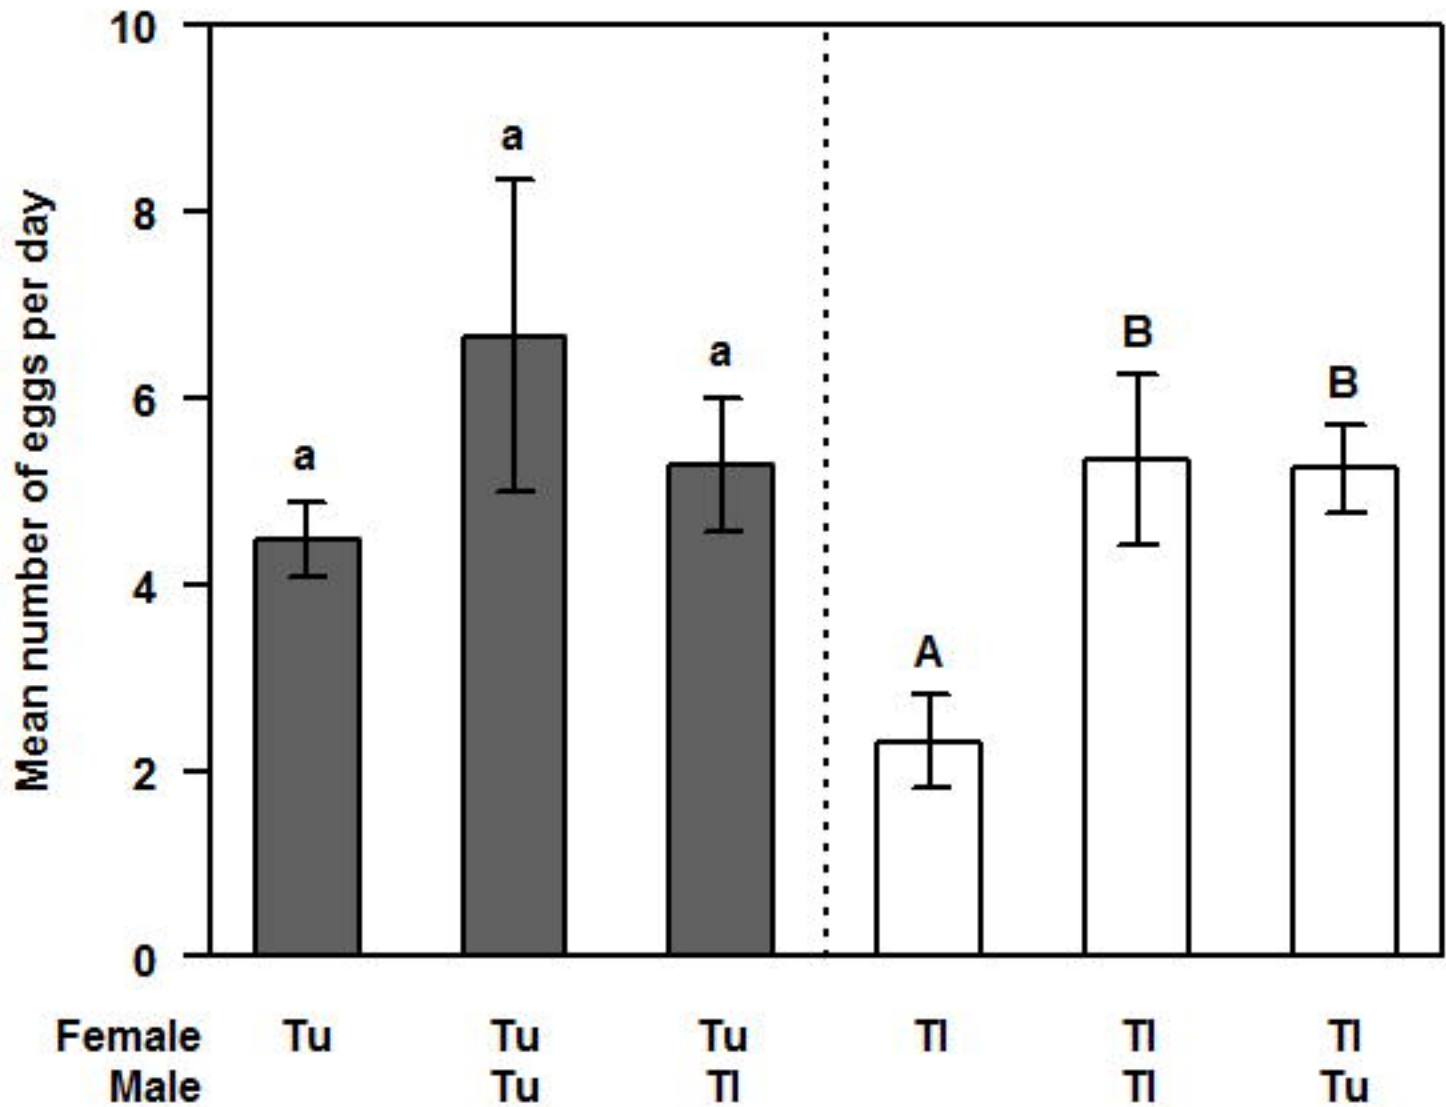

# *T. urticae* versus *T. evansi*

*T. urticae* females

*T. evansi* females

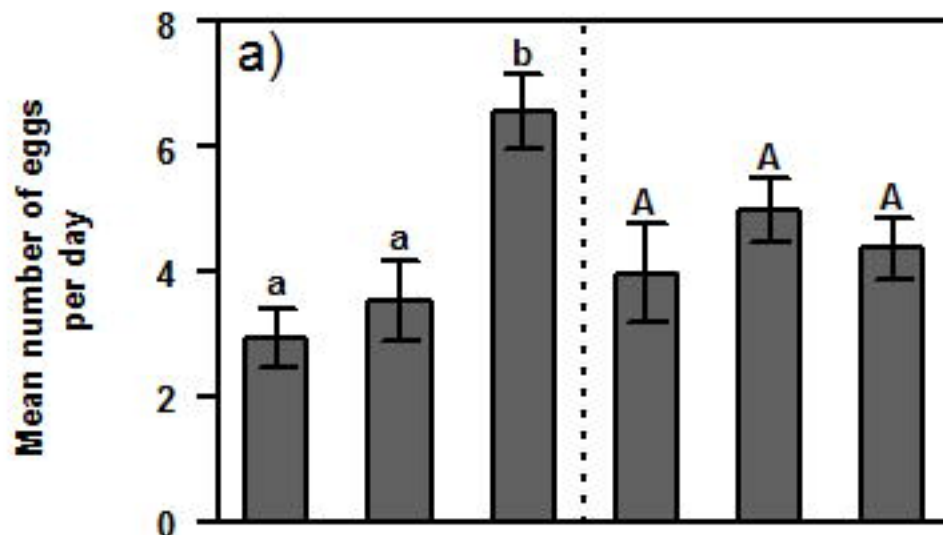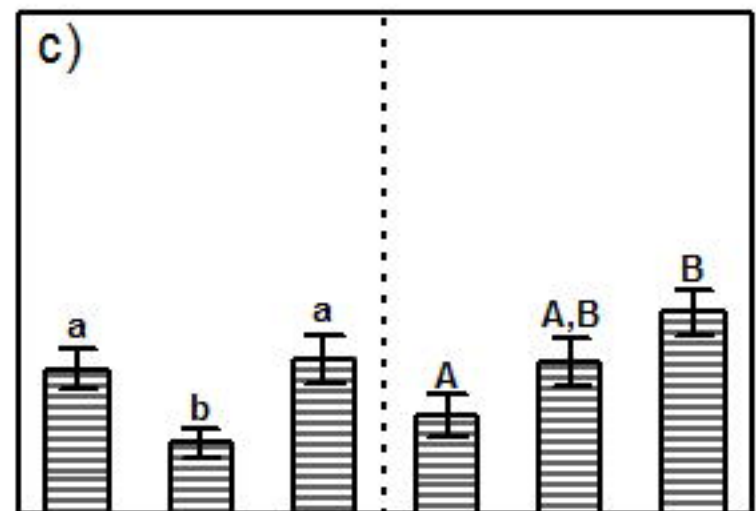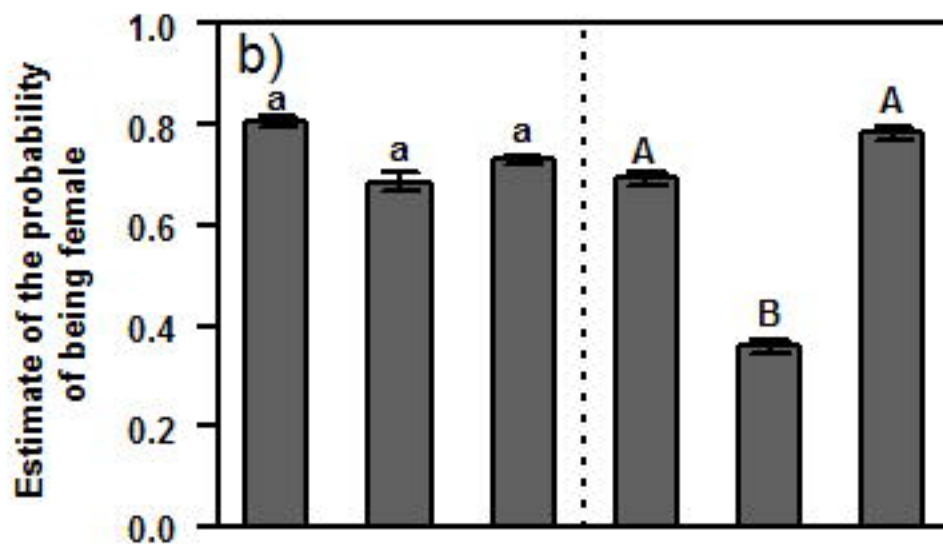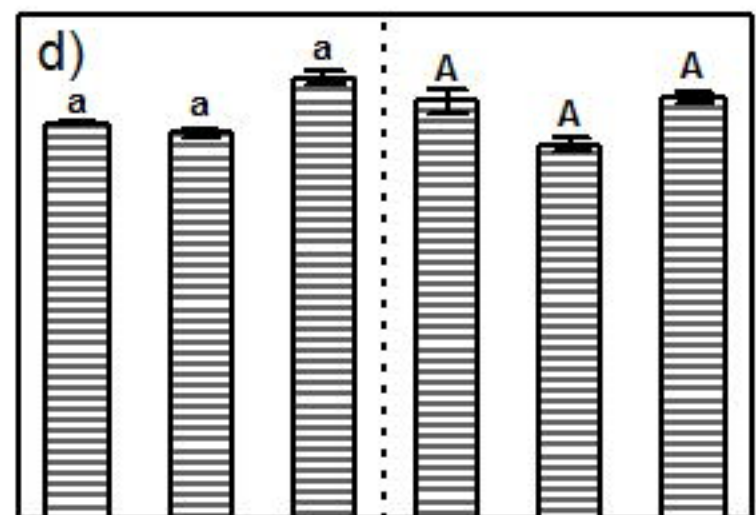

| 1st M    | Tu | Tu | Te | Tu  | Tu  | Te  |
|----------|----|----|----|-----|-----|-----|
| 2nd M    | Tu | Te | Tu | Tu  | Te  | Tu  |
| Interval | 0h | 0h | 0h | 24h | 24h | 24h |

| 1st M                                                                         | Te | Te | Tu | Te  | Te  | Tu  |
|-------------------------------------------------------------------------------|----|----|----|-----|-----|-----|
| 2nd M <th>Te</th> <th>Tu</th> <th>Te</th> <th>Te</th> <th>Tu</th> <th>Te</th> | Te | Tu | Te | Te  | Tu  | Te  |
| Interval                                                                      | 0h | 0h | 0h | 24h | 24h | 24h |

*T. urticae* versus *T. ludeni*

*T. urticae* females

*T. ludeni* females

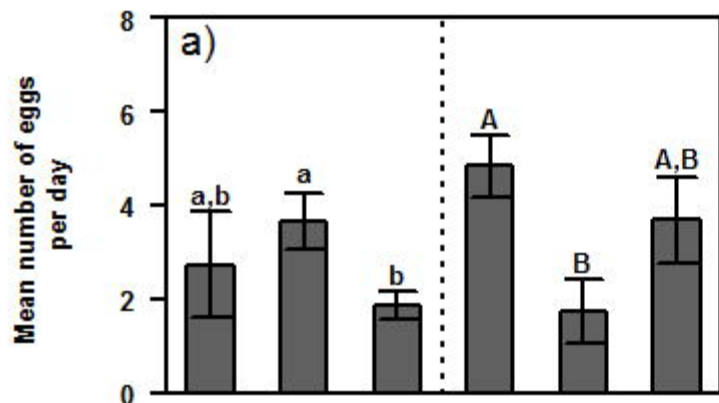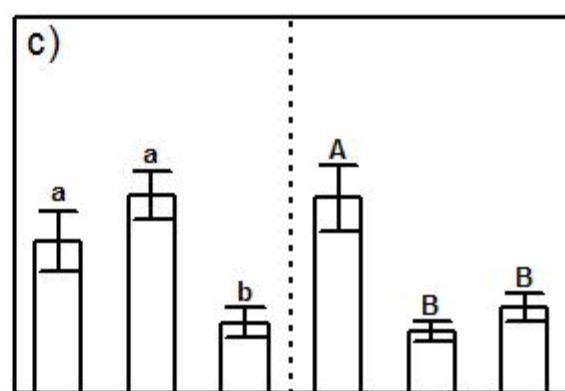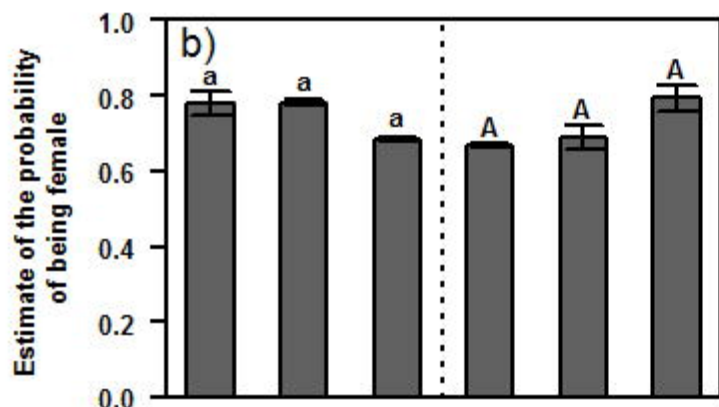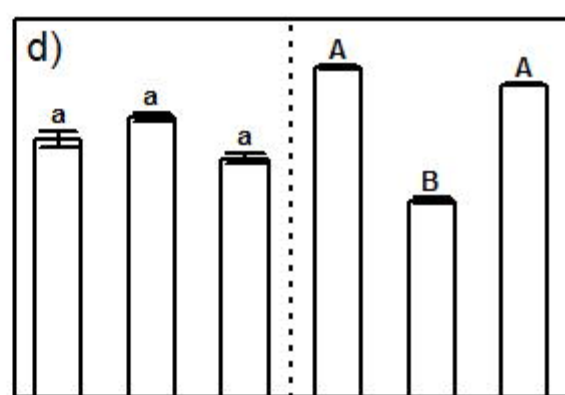

| 1st M    | Tu | Tu | Tl | Tu  | Tu  | Tl  |
|----------|----|----|----|-----|-----|-----|
| 2nd M    | Tu | Tl | Tu | Tu  | Tl  | Tu  |
| Interval | 0h | 0h | 0h | 24h | 24h | 24h |

| Tl | Tl | Tu | Tl  | Tl  | Tu  |
|----|----|----|-----|-----|-----|
| Tl | Tu | Tl | Tl  | Tu  | Tl  |
| 0h | 0h | 0h | 24h | 24h | 24h |

### A) First mating with a heterospecific male

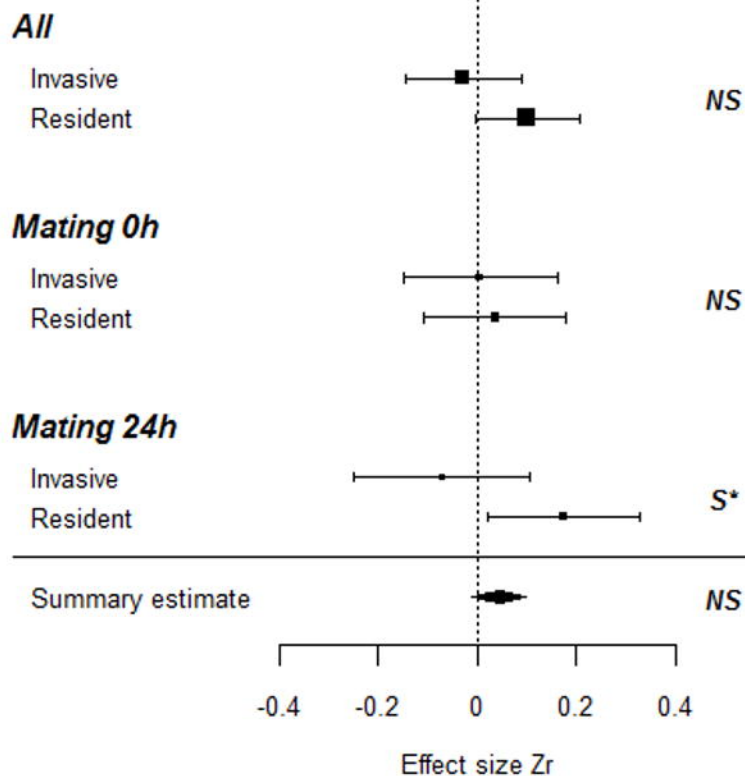

### B) Second mating with a heterospecific male

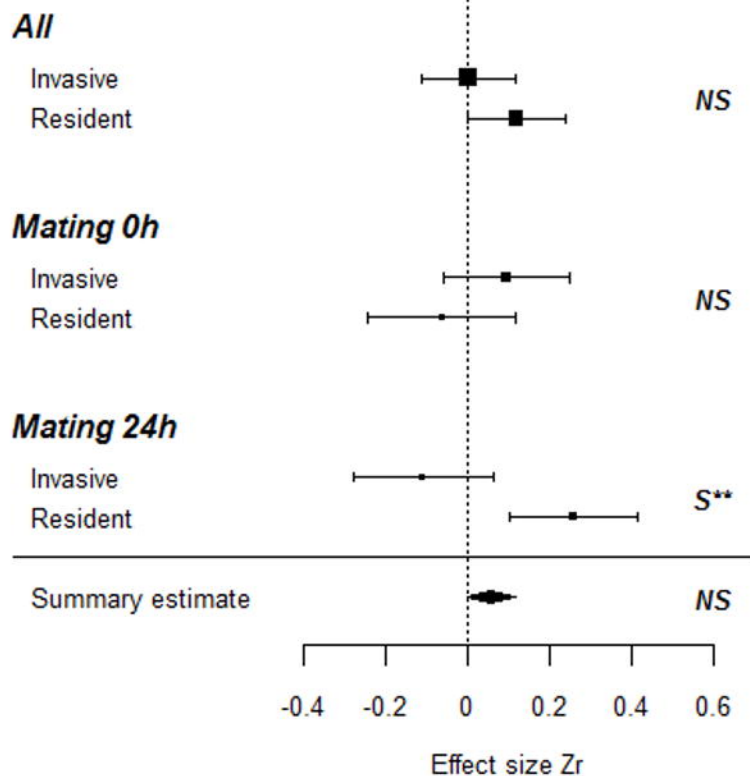

Source: http://www.biorxiv.org/content/10.1101/113274v1.full.pdf
